# Supplementary material
Source: PubMed Central journal article supplement (PMC8997904)
Supplement: NIHMS1786482-supplement-Supplemental_table_legends.pdf [file NIHMS1786482-supplement-Supplemental_table_legends.pdf]

**Table S1. Proteomic analysis of ribosome abundance in cells with altered iRQC activity, Related to Figure 2.** Log2 SILAC ratios (H-indicated genotype:L-parental) for all measured ribosomal proteins from parental, RNF10-KO, parental with RNF10 overexpression (OE), USP10-KO, USP10-KO with RNF10 OE, or USP10/RNF10 double KO (DKO) cells across replicate experiments. Data represented in Figures 2D and 2E.

**Table S2. Proteomic analysis of sucrose gradient fractions with and without HTN, Related to Figures 7 and S5.** Log2 SILAC ratios (H-HTN:L-unt) or label free quantification (LFQ) ion intensities for all measured ribosomal proteins within individual sucrose gradient fractions from untreated or RNase treated cell lysates across three replicate experiments. Data represented in Figures 7D and 7E and S5A-S5F.
